# Supplementary material for: Race and Ethnicity and Sex Variation in COVID-19 Mortality Risks Among Adults Experiencing Homelessness in Los Angeles County, California
Source: PubMed Central journal article supplement (PMC9856229; doi:10.1001/jamanetworkopen.2022.45263), 2022-12-06
Supplement: jamanetwopen-e2245263-s001.pdf [file jamanetwopen-e2245263-s001.pdf]

## Data Sharing Statement

Porter. Race and Ethnicity and Sex Variation in COVID-19 Mortality Risks Among Adults Experiencing Homelessness in Los Angeles County, California. *JAMA Netw Open*. Published December 06, 2022. doi:10.1001/jamanetworkopen.2022.45263

### Data

**Data available:** No

### Additional Information

**Explanation for why data not available:** The data comes from the LA Department of Public Health which restricts the use of de-identified data.
